# Supplementary material
Source: Springer Nature journal article supplement (https://www.springermedizin.de/resource/supplementary/12891_2013_2083_MOESM1_ESM.pdf/9510270)

## A. Precontemplation

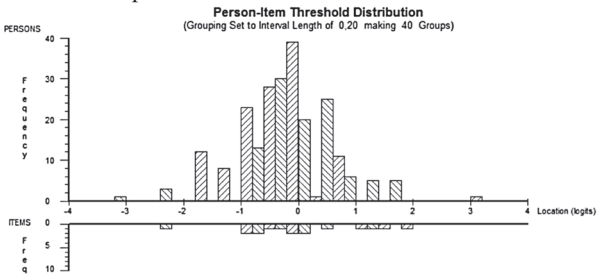

## B. Contemplation

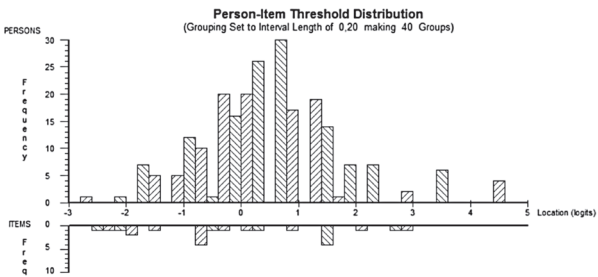

## C. Action

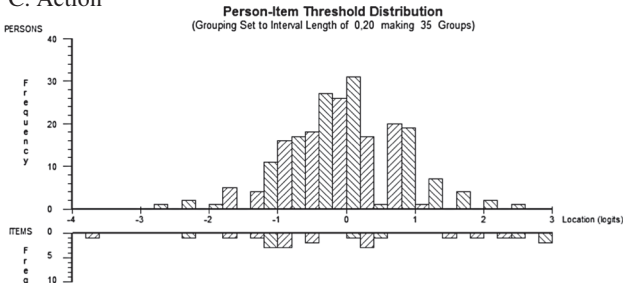

## D. Maintenance

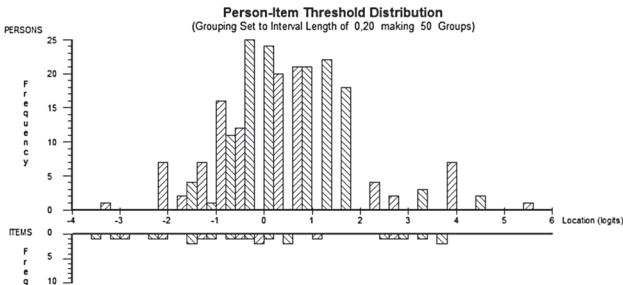

Supplement: MOESM1 [file 9510270]
